# Supplementary material for: Rod-like nickel doped Co3Se4/reduced graphene oxide hybrids as efficient electrocatalysts for oxygen evolution reactions
Source: Royal Society of Chemistry journal article supplement (doi:10.1039/d0nr08591j), 2021-01-01
Supplement: d0nr08591j1.pdf [file d0nr08591j1.pdf]

## Supporting information

### **Rod-like Nickel Doped Co<sub>3</sub>Se<sub>4</sub>/Reduced Graphene Oxide Hybrids as Efficient Electrocatalysts for Oxygen Evolution Reaction**

Wenlong Ye<sup>a</sup>, Yanan Zhang<sup>a</sup>, Jinchen Fan<sup>a,b\*</sup>, Penghui Shi<sup>a,b</sup>, Yulin Min<sup>a,b</sup> and Qunjie  
Xu<sup>a,b\*</sup>

<sup>a</sup>Shanghai Key Laboratory of Materials Protection and Advanced Materials in Electric  
Power, College of Environmental and Chemical Engineering, Shanghai University of  
Electric Power, Shanghai, 200090, China.

<sup>b</sup>Shanghai Institute of Pollution Control and Ecological Security, Shanghai 200090,  
China

E-mail: jinchen.fan@shiep.edu.cn; xuqunjie@shiep.edu.cn

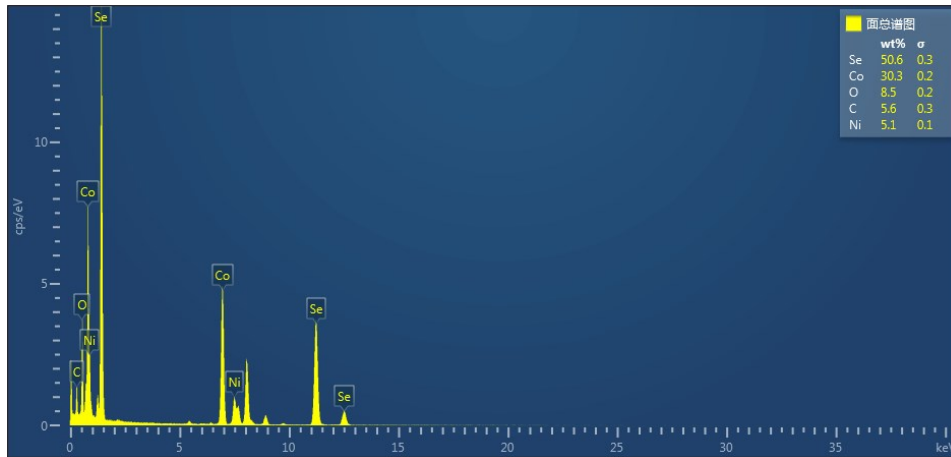

Figure S1. Energy Dispersive X-Ray Spectroscopy of Ni-Co<sub>3</sub>Se<sub>4</sub>/rGO.

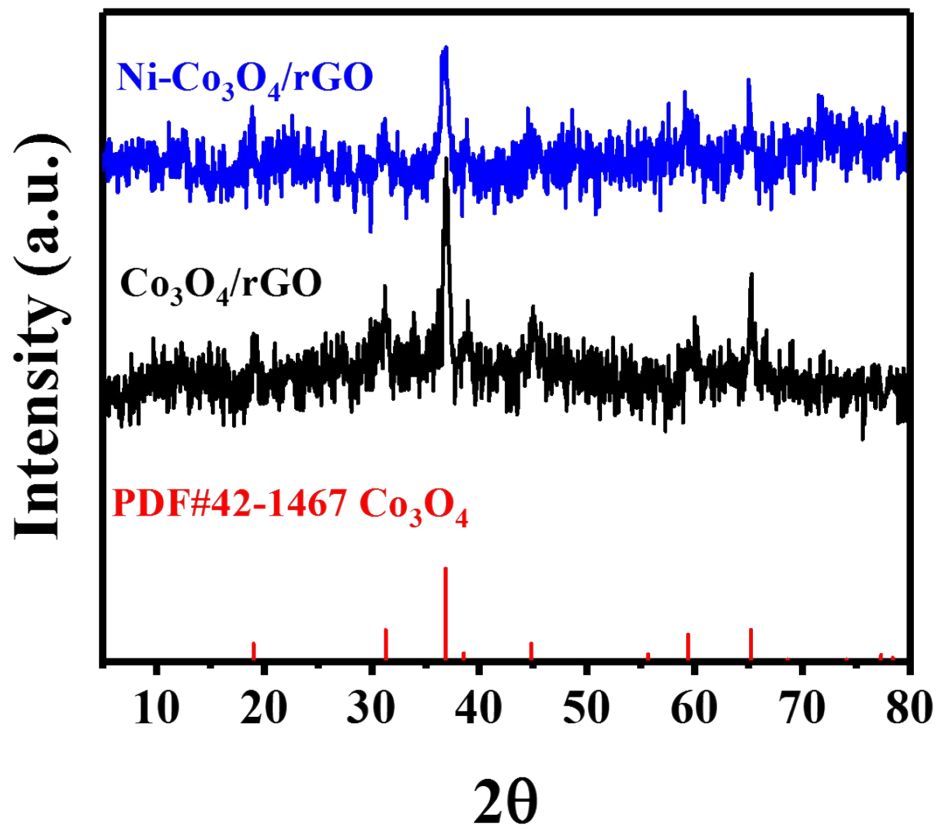

Figure S2. XRD patterns of Co<sub>3</sub>O<sub>4</sub>/rGO and Ni-Co<sub>3</sub>O<sub>4</sub>/rGO.

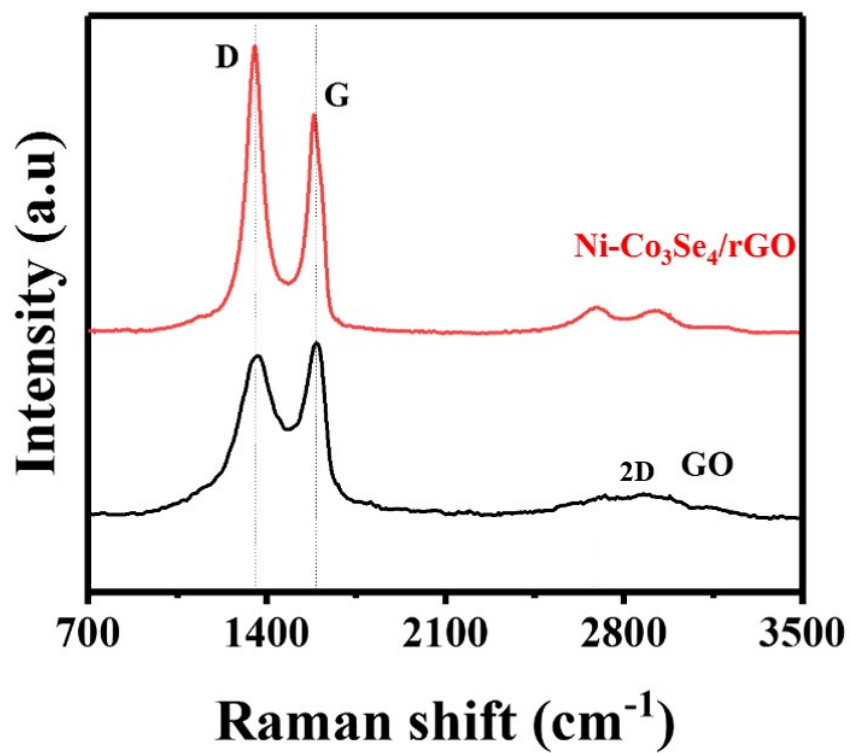

Figure S3. Raman spectra for GO and Ni-Co<sub>3</sub>Se<sub>4</sub>/rGO.

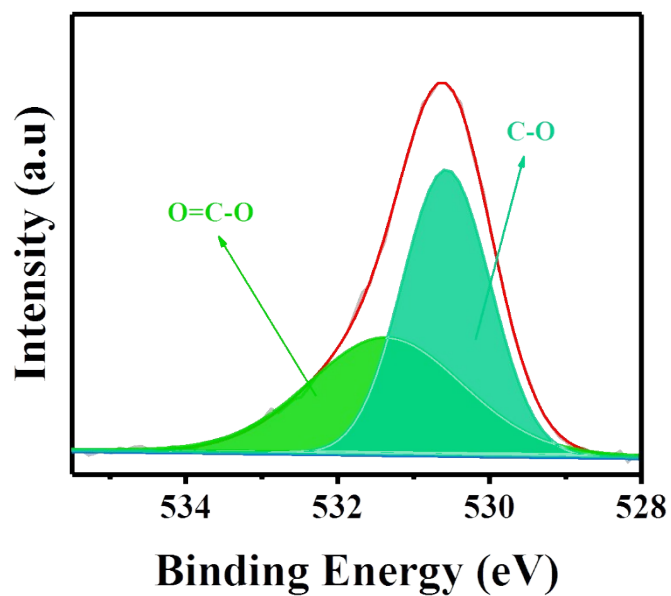

Figure S4. Core-level XPS spectrum for O 1s.

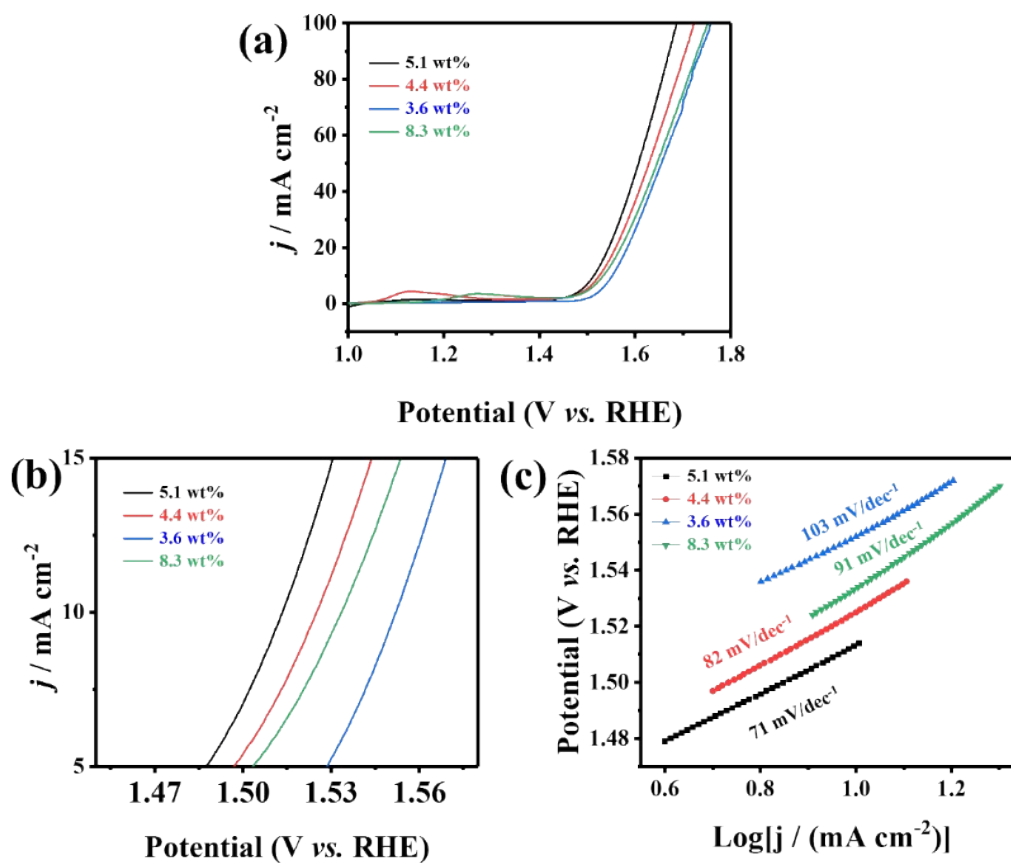

**Figure S5.** (a) LSV curves for Ni-Co<sub>3</sub>Se<sub>4</sub>/rGO with different Ni doping contents, (b) the local enlarged LSV curves for Ni-Co<sub>3</sub>Se<sub>4</sub>/rGO with different Ni doping contents, and (c) Tafel plots for Ni-Co<sub>3</sub>Se<sub>4</sub>/rGO with different Ni doping contents.

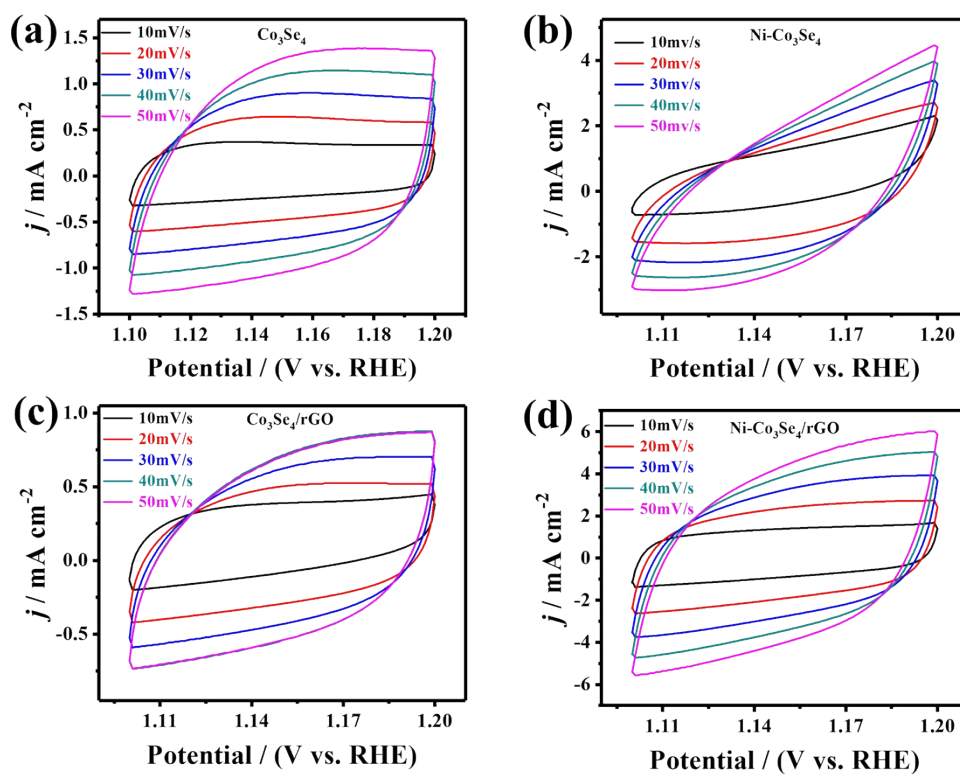

**Figure S6.** CV curves for (a)  $\text{Co}_3\text{Se}_4$ , (b)  $\text{Ni-Co}_3\text{Se}_4$ , (c)  $\text{Co}_3\text{Se}_4/\text{rGO}$ , and (d)  $\text{Ni-Co}_3\text{Se}_4/\text{rGO}$  at different scan rates.

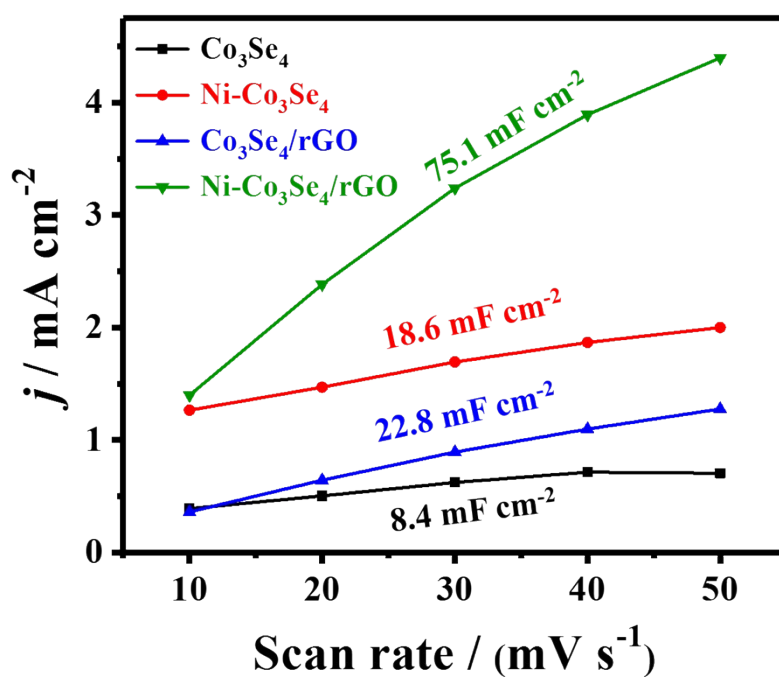

**Figure S7.** Plots of current density difference ( $\Delta j$ ) at 1.15 V (vs. RHE) versus scan rate for calculation of double layer capacitance ( $C_{dl}$ ).
